# Supplementary material for: Deficient IFN Signaling by Myeloid Cells Leads to MAVS-Dependent Virus-Induced Sepsis
Source: PLOS journal article supplement (doi:10.1371/journal.ppat.1004086), 2014-04-17
Supplement: S2 (10.1371/journal.ppat.1004086.s002) [file journal.ppat.1004086.s002]

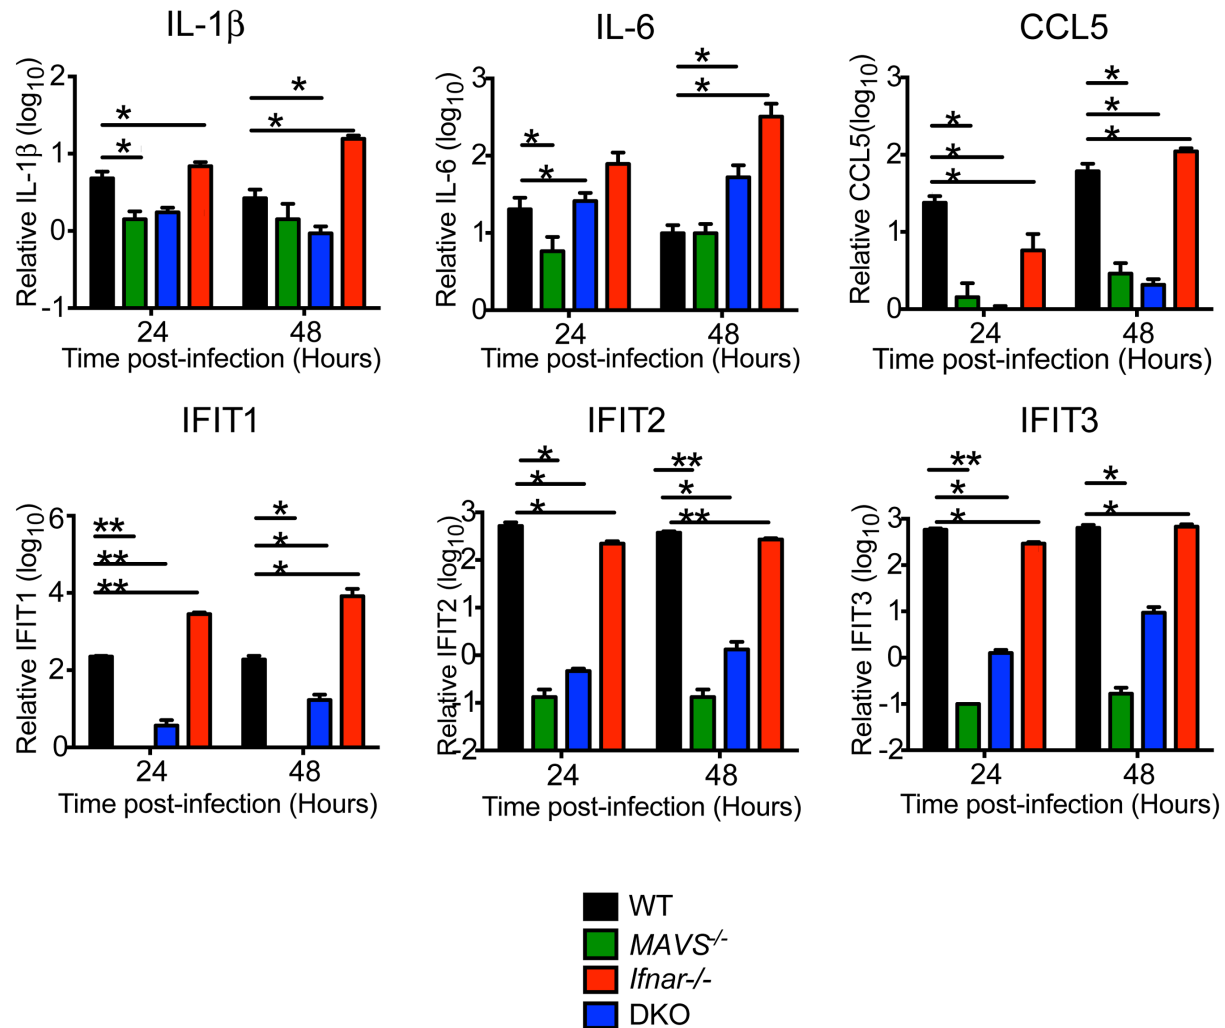

**Figure S2. Levels of cytokines, ISGs, and chemokines in WT and KO DCs after WNV infection.** qRT-PCR of WT, *Mavs*<sup>-/-</sup>, *Ifnar*<sup>-/-</sup>, and *Mavs*<sup>-/-</sup> x *Ifnar*<sup>-/-</sup> DKO DCs 24 and 48 hours after WNV infection. Relative RNA levels of IL-1β, IL-6, CCL5, IFIT1, IFIT2, and IFIT3 are shown and compared to uninfected cells. Mean values ± SD are shown. Asterisks indicate differences that are statistically significant (\*, *P* < 0.05; \*\*, *P* < 0.01).
